# Supplementary material for: Global Transcriptome Profile of Cryptococcus neoformans during Exposure to Hydrogen Peroxide Induced Oxidative Stress
Source: PubMed Central journal article supplement (PMC3557267; doi:10.1371/journal.pone.0055110), 2013-01-28
Supplement: pone.0055110.s007.pdf [file pone.0055110.s007.pdf]

**Table S5: List of *C. neoformans* differentially expressed genes assigned to oxidation-reduction functional category that exhibited persistent induction or repression for a minimum of three time points during H<sub>2</sub>O<sub>2</sub> induced oxidative stress.**

| GENE ID    | ANNOTATION                                    | NAME          | Time after H <sub>2</sub> O <sub>2</sub> addition (min) |       |       |       |       |        |
|------------|-----------------------------------------------|---------------|---------------------------------------------------------|-------|-------|-------|-------|--------|
|            |                                               |               | 5                                                       | 10    | 15    | 30    | 45    |        |
| CNAG-01846 | Pyridine nucleotide-disulphide oxidoreductase |               | Red                                                     | Red   | Green | Green | Green |        |
| CNAG-00462 | Flavoprotein-ubiquinone oxidoreductase        | <i>CIR2</i>   | Red                                                     | Red   | Green | Green | Green | Yellow |
| CNAG-02266 | NADH ubiquinone oxidoreductase                |               | Red                                                     | Red   | Green | Green | Green |        |
| CNAG-04325 | Aromatic ring-opening dioxygenase             |               | Red                                                     | Green | Green | Green | Green |        |
| CNAG-02580 | No Information                                |               | Red                                                     | Green | Green | White | Green |        |
| CNAG-02722 | Aldo/keto reductase family                    |               |                                                         |       | Green | Green | Green |        |
| CNAG-04351 | Aldehyde dehydrogenase family                 | <i>ALD52</i>  |                                                         | Green | Green | Green | White | Yellow |
| CNAG-00984 | short chain dehydrogenase                     | <i>FOX22</i>  |                                                         |       | Green | Green | Green |        |
| CNAG-03674 | Dehydrogenase E1 component                    | <i>KGD1</i>   |                                                         |       | Green | Green | Green | Yellow |
| CNAG-03589 | 2Fe-2S iron-sulfur cluster binding domain     | <i>YAH1</i>   |                                                         |       | Green | Green | Green | Yellow |
| CNAG-06169 | Alcohol dehydrogenase GroES-like domain       | <i>BDH1</i>   |                                                         | Green | Green | Green | Green |        |
| CNAG-02933 | Zinc-binding dehydrogenase                    | <i>ZTA1</i>   |                                                         | Green | Green | Green | Green |        |
| CNAG-05842 | Cytochrome P450                               | <i>ERG110</i> |                                                         | Green | Green | Green | Green |        |
| CNAG-00575 | Catalase (CAT3) no in Bahns data              | <i>CTA12</i>  |                                                         | White | Green | Green | Green | Yellow |
| CNAG-02868 | Indoleamine 2,3-dioxygenase                   | <i>BNA2</i>   |                                                         | Green | Green | Green | Green |        |
| CNAG-01542 | No Information                                | <i>0</i>      |                                                         | White | Green | Green | Green |        |
| CNAG-06638 | Malic enzyme, NAD binding domain              | <i>MAE1</i>   |                                                         | Green | Green | Green | Green | Yellow |
| CNAG-06383 | Cytochrome b5-like Heme/Steroid binding       | <i>CYB25</i>  |                                                         | Green | Green | Green | Green | Yellow |
| CNAG-04553 | short chain dehydrogenase                     |               | Green                                                   | Green | Green | White | White |        |
| CNAG-03517 | Pyridine nucleotide-disulphide oxidoreductase | <i>NDE2</i>   | Green                                                   | Green | Green | Green | Green | Yellow |
| CNAG-03874 | Pyridine nucleotide-disulphide oxidoreductase | <i>AIF12</i>  | Green                                                   | Green | Green | White | White |        |
| CNAG-02577 | Fatty acid hydroxylase                        | <i>SCS7</i>   | Green                                                   | Green | Green | Green | Green |        |
| CNAG-02815 | FAD dependent oxidoreductase                  | <i>GUT2</i>   | Green                                                   | Green | Green | White | White | Yellow |
| CNAG-03834 | Sterol desaturase                             | <i>SUR2</i>   | Green                                                   | Green | Green | Green | Green |        |
| CNAG-04687 | Fatty acid desaturase                         | <i>OLE1</i>   | Green                                                   | Green | Green | Green | Green |        |
| CNAG-00654 | No Information                                | <i>SRX1</i>   | Green                                                   | Green | Green | Green | Green |        |
| CNAG-05090 | Zinc-binding dehydrogenase                    | <i>ZTA13</i>  | Red                                                     | Red   | Red   | White | Green |        |
| CNAG-03238 | No Information                                | <i>0</i>      | Red                                                     | Red   | Red   | Red   | White |        |
| CNAG-03389 | Taurine catabolism dioxygenase TauD           | <i>JLP1</i>   | Red                                                     | White | Red   | Red   | Red   |        |
| CNAG-00993 | Ubiquinone biosynthesis protein COQ7          | <i>CAT5</i>   | Red                                                     | Red   | Red   | Red   | Red   | Yellow |
| CNAG-05440 | Pyridoxamine 5'-phosphate oxidase             | <i>PDX3</i>   | Red                                                     | Red   | Red   | White | White |        |
| CNAG-03266 | lactate/malate dehydrogenase                  | <i>MDH1</i>   | White                                                   | White | Red   | Red   | Red   | Yellow |
| CNAG-01914 | No Information mitochondrial protein          | <i>YLR290</i> | White                                                   | White | Red   | Red   | Red   | Yellow |
| CNAG-02830 | Ergosterol biosynthesis                       | <i>ERG4</i>   | White                                                   | Red   | Red   | Red   | Red   |        |
| CNAG-06917 | AhpC/TSA family                               | <i>TSA3</i>   | White                                                   | Red   | Red   | Red   | White |        |
| CNAG-00879 | Glut/Leu/Phe/Val dehydrogenase                | <i>GDH2</i>   | White                                                   | Green | Red   | Red   | Red   | Yellow |
| CNAG-04488 | short chain dehydrogenase                     | <i>IFA38</i>  | White                                                   | Red   | Red   | Red   | White | Yellow |
| CNAG-07749 | short chain dehydrogenase 2.3xe-16            | <i>TSC10</i>  | White                                                   | Red   | Red   | Red   | White | Yellow |
| CNAG-01120 | 2-oxoacid dehydrogenases acyltransferase      | <i>LAT1</i>   | White                                                   | Red   | Red   | Red   | White | Yellow |
| CNAG-04969 | UDP-glucose/GDP-mannose dehydrogenase         | <i>UDG1</i>   | White                                                   | Red   | Red   | Red   | Red   |        |
| CNAG-06012 | Oxidoreductase FAD-binding domain             | <i>CBR1</i>   | White                                                   | Red   | Red   | Red   | Red   | Yellow |
| CNAG-06764 | short chain dehydrogenase                     | <i>FOX21</i>  | White                                                   | Red   | Red   | Red   | White | Yellow |
| CNAG-05059 | Transketolase, pyridine binding domain        | <i>PDB1</i>   | White                                                   | Red   | Red   | Red   | Red   | Yellow |
| CNAG-00012 | Oxidoreductase family, NAD-binding            |               | White                                                   | Red   | Red   | Red   | White |        |
| CNAG-07660 | Dehydrogenase E1 component                    | <i>PDA1</i>   | White                                                   | Red   | Red   | Red   | White | Yellow |
| CNAG-03322 | NAD dependent epimerase/dehydratase family    | <i>GAL1</i>   | White                                                   | Red   | Red   | Red   | Red   |        |

|            |                                            |              |  |   |   |   |   |   |   |
|------------|--------------------------------------------|--------------|--|---|---|---|---|---|---|
| CNAG-04605 | 3-beta hydroxysteroid dehydrogenase/family | <i>ERG26</i> |  |   | ■ | ■ | ■ | ■ | ■ |
| CNAG-02590 | NAD bind 6-phosphogluconate dehydrogenase  | <i>0</i>     |  |   | ■ | ■ | ■ | ■ | ■ |
| CNAG-04652 | Zinc-binding dehydrogenase                 |              |  |   | ■ | ■ | ■ | ■ | ■ |
| CNAG-02099 | Acyl transferase domain                    | <i>FAS1</i>  |  | ■ | ■ | ■ | ■ | ■ | ■ |
| CNAG-02208 | Ribonucleotide reductase, barrel domain    | <i>RNR1</i>  |  |   | ■ | ■ | ■ | ■ | ■ |

- down-regulation
- up-regulation
- Potential homologs in *S. cerevisiae* predicted to be located to mitochondria.

Each gene has been named after identification of its potential ortholog in *S. cerevisiae* genome. Mitochondrial location of *S. cerevisiae* gene has been obtained from individual gene annotation page at *S. cerevisiae* genome database.
